# Supplementary material for: Gully rehabilitation in Southern Ethiopia – value and impacts for farmers
Source: Copernicus journal article supplement (doi:10.5194/egusphere-2024-1125), 2024-04-24
Supplement: Supplementary file 1 [file egusphere-2024-1125-supplement.pdf]

# Supplementary material 1. Benefits of gully rehabilitation measures in the perspective of local communities

| Factors                                            | Women Group |     |     |     |    |               | Men Group |     |     |     |    |               |
|----------------------------------------------------|-------------|-----|-----|-----|----|---------------|-----------|-----|-----|-----|----|---------------|
|                                                    | GHT         | GRP | LRC | VLC | GC | F-Category    | GHT       | GRP | LRC | VLC | GC | F-Category    |
| Enables additional income                          |             |     |     |     |    | Economic      | ✓         | ✓   | ✓   | ✓   | ✓  | Economic      |
| Uses locally available materials                   | ✓           | ✓   |     | ✓   |    | Economic      |           |     |     |     |    | Economic      |
| Facilitates movement of people and livestock       |             | ✓   | ✓   | ✓   | ✓  | Social        | ✓         | ✓   | ✓   | ✓   | ✓  | Social        |
| Creates opportunities for fattening                |             | ✓   |     |     | ✓  | Economic      |           | ✓   |     |     |    | Economic      |
| Increases access to food and food diversity in HHs |             |     |     |     |    | Social        | ✓         | ✓   | ✓   | ✓   |    | Social        |
| Conserves water/increase access                    |             |     | ✓   |     | ✓  | Environmental |           |     |     |     |    | Environmental |
| Improves the scene of the environment              |             |     |     |     |    | Environmental |           | ✓   |     |     |    | Environmental |
| Improves agricultural production                   | ✓           | ✓   |     | ✓   | ✓  | Economic      | ✓         |     |     |     |    | Economic      |
| Increases land productivity                        | ✓           | ✓   | ✓   | ✓   | ✓  | Economic      | ✓         | ✓   |     |     | ✓  | Economic      |
| Increases access to productive land                |             |     | ✓   |     |    | Economic      |           |     |     |     |    | Economic      |
| Improves soil fertility                            | ✓           | ✓   |     | ✓   | ✓  | Environmental |           |     |     | ✓   |    | Environmental |
| Increases availability of livestock feed           | ✓           | ✓   | ✓   |     | ✓  | Economic      | ✓         | ✓   | ✓   | ✓   | ✓  | Economic      |
| Rehabilitates degraded lands                       |             |     |     |     |    | Environmental |           |     | ✓   |     |    | Environmental |
| Increases livestock products                       |             | ✓   |     |     |    | Economic      |           | ✓   |     |     |    | Economic      |
| Improves soil moisture content                     |             | ✓   |     |     | ✓  | Environmental | ✓         | ✓   | ✓   | ✓   | ✓  | Environmental |
| Reduces damage caused by flood                     |             |     |     |     |    | Social        | ✓         | ✓   | ✓   |     | ✓  | Social        |
| Regulates micro-climate                            |             |     |     |     |    | Environmental |           |     |     |     | ✓  | Environmental |
| Easy to construct and takes less labor             |             |     |     |     |    | Economic      | ✓         |     |     | ✓   |    | Economic      |
| Lasts for longer time                              |             |     |     |     |    | Economic      |           |     | ✓   |     |    | Economic      |
| Serves as a learning site                          |             |     |     |     |    | Social        |           | ✓   | ✓   | ✓   |    | Social        |
| Prevents farmland loss                             | ✓           | ✓   | ✓   | ✓   | ✓  | Economic      |           |     |     |     |    | Economic      |
| Reduces soil erosion                               | ✓           | ✓   | ✓   |     | ✓  | Environmental | ✓         | ✓   | ✓   | ✓   | ✓  | Environmental |
| Reduced run off                                    | ✓           | ✓   | ✓   | ✓   | ✓  | Environmental |           |     |     |     |    | Environmental |

**Note:** GHT refers to gully head treatment, GRP – gully reshaping and planting, LRC – loose rock check-dam, VLC – Vegetation log check-dam, GC – gabion check-dam and F-category – factor category.

Supplementary material 2. Costs of gully rehabilitation measures in the perspective of local communities

| Factors                                                  | Women Group |     |     |     |    |               | Men Group |     |     |     |    |               |
|----------------------------------------------------------|-------------|-----|-----|-----|----|---------------|-----------|-----|-----|-----|----|---------------|
|                                                          | GHT         | GRP | LRC | VLC | GC | F-Category    | GHT       | GRP | LRC | VLC | GC | F-Category    |
| Takes more productive lands                              | ✓           |     |     |     |    | Economic      |           | ✓   |     |     |    | Economic      |
| Construction takes time                                  |             |     | ✓   |     | ✓  | Social        |           |     |     |     |    | Social        |
| Requires energy and labor                                | ✓           | ✓   | ✓   | ✓   | ✓  | Economic      | ✓         | ✓   | ✓   |     | ✓  | Economic      |
| Needs to be done in large scale                          |             |     |     |     |    | Economic      | ✓         | ✓   |     | ✓   |    | Economic      |
| Causes accidents to people and livestock                 |             | ✓   | ✓   | ✓   | ✓  | Social        |           |     | ✓   |     | ✓  | Social        |
| Requires collaboration among farmers                     |             |     |     |     |    | Social        |           |     |     |     | ✓  | Social        |
| Does not last long                                       | ✓           |     | ✓   | ✓   |    | Economic      |           |     |     | ✓   |    | Economic      |
| Costly                                                   | ✓           | ✓   | ✓   |     | ✓  | Economic      |           |     |     |     | ✓  | Economic      |
| Less effective in reducing runoff/erosion                |             |     |     | ✓   |    | Environmental |           |     |     | ✓   |    | Environmental |
| Could cause conflict among farmers                       |             | ✓   |     |     | ✓  | Social        |           |     |     |     |    | Social        |
| Lack of locally available materials                      | ✓           | ✓   | ✓   | ✓   | ✓  | Economic      | ✓         | ✓   | ✓   | ✓   | ✓  | Economic      |
| Requires integration with biological measures            |             |     |     |     |    | Environmental |           |     | ✓   |     | ✓  | Environmental |
| Requires skilled labor & technical support               |             |     | ✓   |     | ✓  | Social        |           | ✓   | ✓   |     | ✓  | Social        |
| Requires maintenance and protection from theft of stones |             |     |     |     |    | Economic      |           |     | ✓   |     |    | Economic      |
| Requires farm implements                                 | ✓           | ✓   | ✓   |     | ✓  | Economic      |           | ✓   | ✓   |     | ✓  | Economic      |
| Shortage of seedlings                                    |             |     |     |     |    | Economic      |           | ✓   |     |     |    | Economic      |
| The wood and materials like nails are exposed to theft   |             |     |     | ✓   |    | Social        |           |     |     |     |    | Social        |
